1 A recombinant rotavirus harboring a spike protein with a heterologous peptide  
2 reveals a novel role of VP4 in viroplasm stability

3 Guido Papa<sup>a,\*</sup>, Janine Vetter<sup>b,1</sup>, Michael Seyffert<sup>b</sup>, Kapila Gunasekera<sup>c</sup>, Giuditta De Lorenzo<sup>a,\*</sup>,  
4 Mahesa Wiesendanger<sup>b,d</sup>, Elisabeth M. Schraner<sup>b</sup>, Jean-Louis Reymond<sup>c</sup>, Cornel Fraefel<sup>b</sup>, Oscar R.  
5 Burrone<sup>a</sup>, Catherine Eichwald<sup>b,#</sup>.

6

7 <sup>a</sup>Molecular Immunology Laboratory, International Centre for Genetic Engineering and  
8 Biotechnology, Trieste, Italy

9 <sup>b</sup>Institute of Virology, University of Zurich, Zurich, Switzerland;

10 <sup>c</sup>Department of Chemistry and Biochemistry and Pharmaceutical Sciences, University of Bern,  
11 Bern, Switzerland;

12 <sup>d</sup>Institute of Veterinary Anatomy, University of Zurich, Zurich, Switzerland.

13

14 Running Head: New role of rotavirus VP4

15

16 <sup>#</sup>**Address correspondence to** Catherine Eichwald, [ceichwald@vetvir.uzh.ch](mailto:ceichwald@vetvir.uzh.ch)

17 <sup>1</sup>**Author Contributions:** GP and JV contributed equally to this work.

18 **\*Present address:** GP: MRC Laboratory of Molecular Biology, Cambridge, UK; and GDL: MRC-  
19 University of Glasgow, Centre for Virus Research, Glasgow, UK

20 **Keywords:** rotavirus, spike-protein, viroplasm, VP4, reverse-genetics.

21

22 This manuscript has 230 words in the abstract and 5'232 words in the text.

23 **ABSTRACT**

24           The rotavirus (RV) VP4 spike protrudes as a trimeric structure from the five-fold axes of the  
25 virion triple-layer. Infectious RV particles need to be proteolytically cleaved in VP4 into two  
26 subunits, VP8\* and VP5\*, constituting both the distal part and central body of the virus spike.  
27 Modification of VP4 has been challenging as it is involved in biological process including the  
28 interaction with sialic acid and integrins, cell tropism and hemagglutinin activity. Here, we  
29 engineered a loop at position K145-G150 in the lectin domain of the VP8\* subunit to harbor a small  
30 biotin acceptor peptide (BAP) tag and rescued viable viral particles using RV reverse genetics  
31 system. This rRV/VP4-BAP internalizes, replicates, and generates virus progeny, demonstrating  
32 that the VP4 spike of RV particles can be genetically manipulated by the incorporation of at least 15  
33 exogenous amino acids. Although, VP4-BAP had a similar distribution as VP4 in infected cells by  
34 localizing in the cytoskeleton and surrounding viroplasms. However, compared to wild-type RV,  
35 rRV/VP4-BAP featured a reduced replication fitness and impaired viroplasm stability. Upon  
36 treatment of viroplasms with 1,6-hexanediol, a drug disrupting liquid-liquid phase-separated  
37 condensates, the kinetic of rRV/VP4-BAP viroplasm recovery was delayed, and their size and  
38 numbers reduced when compared to viroplasms of wild type RV. Moreover, siRNA silencing of  
39 VP4 expression in RV strain SA11 showed similar recovery patterns as rRV/VP4-BAP, revealing a  
40 novel function of VP4 in viroplasm stability.

41 **IMPORTANCE** The rotavirus (RV) spike protein, VP4, has a relevant role in several steps  
42 involving virion internalization. The strategic position of VP4 in the virion resulted in a challenge  
43 for the addition of an exogenous peptide producing infectious particles. The identification of a  
44 specific loop in position K145-G150 in the VP8\* subunit of VP4 allowed the rescue by RV reverse  
45 genetics of a recombinant RV harboring VP4 containing a 15 amino acids tag. This study  
46 demonstrates this recombinant virus has similar replication properties as a wild-type virus.  
47 Moreover, we also discovered that VP4 is necessary for the assembly and stabilization of the

48 cytosolic replication compartments, the viroplasms, demonstrating a novel role of this protein in the  
49 RV life cycle.

50

## 51 INTRODUCTION

52 Rotavirus (RV) is the primary etiological agent responsible for severe gastroenteritis and  
53 dehydration in infants and young children worldwide (1) as well as young animals such as piglets,  
54 calves, and poultries, thus representing a negative economic impact on livestock (2-4). RV virions  
55 are non-enveloped particles composed of three concentric layers. The virus core-shell encloses  
56 eleven double-stranded RNA (dsRNA) genome segments and twelve copies of the structural  
57 proteins VP1 (the RNA-dependent RNA polymerase) and the guanyl-methyltransferase VP3 (5, 6).  
58 The icosahedral core-shell (T=1, symmetry) is composed of twelve decamers of VP2 and  
59 surrounded by 260 trimers of the abundant structural protein VP6, constituting the transcriptionally  
60 active double-layered particles (DLPs) (7, 8). On top of each VP6 trimer stands a trimer of the  
61 glycoprotein VP7, the main building component of the outer layer of the virion that also shows an  
62 icosahedral symmetry (T=13). At each of the 5-fold axes of the outer layer, the VP4 spike protein is  
63 anchored in a trimeric conformation, although adopting a dimeric appearance when visualized from  
64 the above capsid surface (9-12). Infectious RV virions, also named triple-layered particles (TLPs),  
65 rely on the cleavage of the VP4 spike protein by a trypsin-like enzyme found in the intestinal tract  
66 (13). The proteolytic cleavage of VP4 (88 kDa) entails two main products, VP8\* (28 kDa, amino  
67 acids 1-247) and VP5\* (60 kDa, amino acids 248-776) that remain non-covalently associated with  
68 the virion (14, 15). VP8\* and a significant portion of VP5\*, VP5CT (amino acids 246-477), as  
69 analyzed by crystallography, constitute the distal globular density and the central body of the spike,  
70 respectively (16, 17). The VP8\* subunit has several functions such as haemagglutinin activity (18),  
71 involvement in the binding to sialic acid (17), and a determinant role in virus tropism, while VP5\*  
72 has been implicated in the interaction with integrins (19-21). Interestingly, VP4 is not only involved  
73 in RV tropism, attachment, neutralization, and entry into host cells, but has also been shown to play  
74 an essential role in virion morphogenesis. During virus internalization, VP4 was shown to bind to  
75 the small GTPase Rab5 and PRA1 within early endosomes (22), to directly activate the heat-shock

76 protein 70 (23, 24) and to bind to the actin-binding protein drebrin (25) followed by association to  
77 the microtubules and actin cytoskeletons (26-31).

78 Specific *in vivo* biotinylation of cellular targets can be achieved by adding a small biotin  
79 acceptor peptide tag (BAP) (15 amino acids) to the protein of interest and co-expressing with the  
80 *Escherichia coli*-derived biotin ligase, BirA (32). This enzyme covalently links a single biotin  
81 molecule to the unique lysine within the BAP tag (33, 34). This methodology is a powerful  
82 biotechnological tool for versatile applications, such as identifying highly complex interactomes  
83 (35, 36), and permits batch protein and subviral particle (33, 34) refinement at high purity and in  
84 physiological conditions. An example is the incorporation of a BAP tag in RV VP6, allowing  
85 preparation and purification of replication-competent DLPs (33).

86 Here, we describe the generation of a recombinant RV (rRV) harboring a genetically  
87 modified genome segment 4 (gs4) encoding the structural protein VP4 with an in-frame inserted  
88 BAP tag in an external loop of the VP8\* subunit. The biotinylated rRV/VP4-BAP can infect,  
89 replicate and generate virus progeny. Moreover, it revealed a novel function of VP4 associated to  
90 viroplasm assembly and stability.

## 91 **RESULTS**

92 **Production and characterization of recombinant rotavirus expressing VP4-BAP protein.** As  
93 VP4 is the main structural RV protein involved in host cell tropism, attachment, and internalization,  
94 we addressed the question whether it could be engineered by incorporating a peptidic tag within its  
95 coding sequence without compromising its structural and functional properties. To test this  
96 hypothesis, we used the previously published crystal structure of simian RRV VP4 (10) to identify  
97 four different loops localized in the lectin domain (amino acids 65-224) of the VP8\* subunit and  
98 then inserted a BAP tag (33, 34) in the corresponding loops of the simian strain SA11. As depicted  
99 in **Fig. 1A**, the selected amino acid regions for the BAP tag insertions were T96-R101, E109-S114,  
100 N132-Q137, and K145-G150 of VP4 of strain SA11, assigned with colors blue, orange, pink, and

101 green, respectively. The biotinylation of these BAP-tagged VP4 proteins was then analyzed in total  
102 cell lysates in a Western blot-retardation assay (WB-ra) (34). Each of these constructs, driven by a  
103 T7 promoter, was co-transfected with a DNA plasmid encoding the cytosolically localized enzyme  
104 BirA (cyt-BirA) into MA104 cells, which were also infected with a recombinant T7 RNA  
105 polymerase vaccinia virus to allow cytosolic transcription (37). It has been noticed that VP4 was  
106 not expressed when transcribed using a nuclear promoter, probably due to mRNA splicing of the  
107 VP4 transcript. As shown in **Fig. 1B**, the four VP4-BAP variants (**Fig. 1B, lanes 3-10**), but not the  
108 wild type (wt) VP4 (**Fig. 1B, lanes 1 and 2**), were fully biotinylated. Of note, the band detected  
109 above the VP4-BAP band corresponds to a phosphorylation form of the protein only present in  
110 transfected cells but not in RV-infected cells, as demonstrated by the  $\lambda$ -phosphatase treatment (**Fig.**  
111 **S1A and S1B**). Taken together, the results indicate that the expression and stability of the different  
112 VP4 protein mutants were not affected by the location of the inserted BAP tag.

113 We next assessed whether these four VP4-BAP proteins could assemble into infectious  
114 rotavirus particles and support virus replication. For this purpose, we took advantage of a newly  
115 developed reverse genetics system to rescue recombinant rotavirus (rRV) harboring a genetically  
116 modified genome segment 4 (gs4) encoding the different VP4-BAP proteins (gs4-BAP) (38-41).  
117 We were able to rescue only the rRV harboring gs4-BAP encoding the BAP tag within the “green”  
118 loop (**Fig. 1A and C**), herein named rRV/VP4-BAP, as demonstrated by the larger size of the  
119 modified gs4-BAP compared to the wt gs4 in the dsRNA virus genome migration pattern (**Fig. 1C**)  
120 and confirmed by Sanger sequencing (**Fig. S1C**). This outcome suggests that the “green” loop is the  
121 only one that preserves virus infectivity when modified by the BAP tag. The rRV/VP4-BAP  
122 replication kinetic was delayed compared to the recombinant wt strain (rRV/wt) (**Fig. 1D**), even  
123 though similar viral titers were reached at 48 hours post-infection (hpi), suggesting that the VP4-  
124 BAP integration in the virus particle affects the virus assembly rate.

125 We then investigated the ability of VP4-BAP produced by rRV/VP4-BAP to be biotinylated  
126 in cells expressing the BirA enzyme. For this purpose, we generated MA104 cells stably expressing

127 cytosolic localized BirA (MA-cytBirA) and infected them with rRV/VP4-BAP. The produced VP4-  
128 BAP protein showed biotinylation as demonstrated by a band of approx. 85 kDa detected after  
129 incubation with StAv-peroxidase (**Fig. 1E, lane 3**). As expected, VP4 biotinylation was detected  
130 neither in rRV/wt infected MA-cytBirA cells (**Fig. 1E, lane 2**) nor in rRV/VP4-BAP infected  
131 MA104 cells (**Fig. 1E, lanes 4, 5**). Using the WB-ra, we found that the fraction of biotinylated  
132 VP4-BAP corresponded to 73% of the total protein (**Fig. 1F**).

133 We next examined if biotinylated VP4-BAP was able to be incorporated into newly  
134 assembled virus particles. We therefore purified virions produced in MA-cytBirA cells in the  
135 presence of biotin and estimated their biotinylation by the WB-ra. Consistent with our observation  
136 in cell extracts, 67% of the VP4-BAP in virus particles was biotinylated (**Fig. 1G**). We additionally  
137 visualized biotinylated VP4-BAP on purified virions by negative staining electron microscopy  
138 followed by incubation with StAv conjugated to gold particles. Thus, the virions produced in the  
139 presence of biotin were positive to the gold particles (53 %) (**Fig. 1H**). Interestingly, we also  
140 identified the presence of virus coat-like layers by negative staining of purified rRV/VP4-BAP  
141 particles (**Fig. S1D**) that were absent in samples of the purified rRV/wt, suggesting instability of the  
142 rRV/VP4-BAP virions. Moreover, as shown in **Fig. S1E**, these particles appear to have a slightly  
143 larger diameter (~80 nm) when compared to rRV/wt particles (~75 nm) but were still in the range of  
144 TLPs (42).

145 **Internalization of rRV/VP4-BAP and cytosolic localization of VP4-BAP.** Since the virus  
146 replication fitness of rRV/VP4-BAP was delayed compared to rRV-wt, we investigated whether this  
147 was caused by a difference in virion internalization. Purified rRV/VP4-BAP and rRV/wt virions  
148 labeled with StAv-Alexa 555 before infection were compared and analyzed for virus particle  
149 internalization by CLSM. As a control, the virus particles were also immunostained with the  
150 conformational monoclonal antibody (mAb) anti-VP7 (clone 159), which only recognizes the  
151 trimeric form of the VP7 protein (43, 44). Initially (0 min), VP4-BAP and VP7 signals co-localized  
152 on the cell surface, indicating association of virions to the cell membrane, while after two minutes

153 at 37°C, both signals were found already internalized (**Fig. 2A**). These localization patterns were  
154 comparable to the ones observed for the same time points with rRV/wt virions (anti-VP7, clone  
155 159), suggesting no differences in the internalization mechanism between both viruses.

156 We then compared the localization of the newly produced biotinylated VP4-BAP in  
157 rRV/VP4-BAP infected MA-cytBirA cells at 6 hpi, a time point with well-assembled viroplasms  
158 (45). For this purpose, infected cells were incubated with or without biotin for 4 hours before  
159 fixation. Biotinylated VP4-BAP, detected with StAv-Alexa 555, was found close to viroplasms  
160 (revealed with anti-NSP5) and forming bundle-like structures presumably because of the  
161 association of VP4 with microtubules and actin filaments (26, 29) (**Fig. 2B**). As expected, no StAv-  
162 Alexa 555 signal was detected in cells infected with rRV/wt or with rRV/VP4-BAP in the absence  
163 of biotin. Notably, the biotinylated VP4-BAP was found surrounding viroplasms and co-localizing  
164 with VP7 in the endoplasmic reticulum (ER) (**Fig. 2C-D**), suggesting that the modification exerted  
165 in VP4-BAP does not impact VP4 subcellular localization during RV replication.

166 **rRV/VP4-BAP revealed a role of VP4 in viroplasm stability.** We noticed a different behavior of  
167 viroplasms formed by rRV/VP4-BAP or rRV/wt upon fixation of infected cells with methanol.  
168 More precisely, few intact viroplasms were detectable in cells infected with rRV/VP4-BAP in  
169 contrast to rRV/wt viroplasms, which remained as globular cytosolic inclusions (**Fig. S2A**).  
170 Paraformaldehyde fixation did not show differences between the two viruses suggesting a  
171 susceptibility of rRV/VP4-BAP viroplasms to alcohols. Since viroplasms have properties of liquid-  
172 liquid phase-separated (LLPS) condensates (45-47), and rRV/VP4-BAP viroplasms are less stable,  
173 we hypothesized that VP4 may have a yet unidentified role in the viroplasm stability. To challenge  
174 this hypothesis, we used 1,6-hexanediol (1,6-HD), a well-described aliphatic alcohol able to disrupt  
175 weak hydrophobic protein-protein or protein-RNA interactions, which are key drivers of liquid-  
176 liquid phase separation (48, 49) and recently shown to be effective in dissolving RV viroplasms  
177 (50). To visualize viroplasms formation in living cells, we took advantage of our previously  
178 established MA104 cell line stably expressing NSP2 fused to the monomeric fluorescent protein



179 mCherry (herein named MA-NSP2-mCherry), which is recruited into viroplasms during RV  
180 infection (40, 45, 46). Upon infection of MA-NSP2-mCherry cells with either rRV/VP4-BAP or  
181 rRV/wt followed by addition of 1,6-HD for 6 min at 5 hpi (**Fig. 3A**), the viroplasms formed by both  
182 rRVs dissolved and then readily recovered by 30 min after the compound was washed out (**Fig.**  
183 **S2B**). Interestingly, the rRV-VP4-BAP viroplasms had a delayed recovery kinetic compared to  
184 those from rRV/wt at short times after removing the drug (2 min) as denoted by quantifying either  
185 the numbers of cells showing viroplasms (**Fig. 3B**) or the numbers of viroplasms per cell (**Fig. 3C**),  
186 despite the reduced numbers of viroplasms present in cells infected with rRV-VP4-BAP (**Fig. 3D**)  
187 just before the addition of 1,6 HD. Also, the initial size of rRV/VP4-BAP viroplasms was  
188 significantly smaller than that of the rRV/wt viroplasms (**Fig. 3E**) and showed delayed size  
189 recovery upon 1,6 HD removal (**Fig. 3F**). Notably, at 2 min post-recovery, the viroplasm  
190 perinuclear localization was delayed as well for the virus with the tagged VP4 (**Fig. S2C-D**).

191 Next, we wanted to examine whether the liquid-like properties of rRV/VP4-BAP viroplasms  
192 were altered. For this purpose, we measured the NSP2-mCherry diffusion dynamics in single  
193 viroplasms using fluorescence recovery after photobleaching (FRAP) experiments (**Fig. 3G and**  
194 **S2E**). Surprisingly, we found that the viroplasms fluorescence recovery after photobleaching at 5  
195 hpi was similar for both viruses. Moreover, no differences were observed in the half-time recovery  
196 or mobile fraction. (**Fig. S2F-G**). Thus, these results exclude differences in the liquid-like  
197 properties of these globular inclusions. In order to further characterize the relationship between  
198 viroplasms and VP4, we used a siRNA depletion approach. Although silencing of VP4 was  
199 previously shown to impair assembly of the virion-third layer leading to the accumulation of DLPs,  
200 viroplasms were still formed (**Fig. S3A-B**) (51). We thus reasoned that in the absence of VP4,  
201 viroplasms should have similar behavior as those observed during rRV/VP4-BAP infection.  
202 Although methanol fixation of viroplasms in VP4 silenced cells and infected with RV strain SA11  
203 did not substantially affect viroplasm morphology to the same extend as that of rRV/VP4-BAP  
204 (**Fig. S3C**). Specifically, the viroplasms in the cells infected with the wt virus showed a diffuse

205 morphology while those in rRV/VP4-BAP completely dissolved. As described above, experiments  
206 performed with 1,6-HD (**Fig. S3D**) had a similar delayed viroplasm recovery kinetic on VP4-less  
207 viroplasms as observed for rRV/VP4-BAP viroplasms (**Fig. 3H**). Moreover, the number (**Fig. 3I**)  
208 and the size (**Fig. 3J**) of viroplasms were both decreased in siVP4 treated cells when compared to  
209 the experimental controls.

210 Collectively, our data indicate that VP4 can be modified by the insertion of relatively short  
211 tags at least in one position within the VP8\* lectin domain of VP4 and suggest that VP4 plays a role  
212 in the stability and dynamics of the viroplasms.

## 213 **DISCUSSION**

214 The external coat layer of the RV virion can be modified by adding *in vitro* a specific ratio  
215 of VP7 and VP4 proteins to purified DLPs to generate recoated TLPs (rcTLPs) (10-12, 52), which  
216 is a valuable tool to study the VP4 structural requirements allowing virion internalization (10).  
217 However, rcTLPs have methodological limitations and do not allow transferring the parental  
218 phenotype to the virus progeny. Moreover, rcTLPs only allow single amino acid substitutions of the  
219 spike VP4 (53, 54). Here, we used a RV reverse genetics system (40) to show that it is possible to  
220 modify an RV structural protein and specifically to remodel the spike protein VP4. For this purpose,  
221 four exposed loops present in the VP8\* subunit lectin domain were modified by incorporating a  
222 short BAP tag of 15 amino acids. Interestingly, although the four differently modified proteins  
223 could be efficiently biotinylated in transfected cells, only one of them, with a BAP tag inserted in  
224 the K145-G150 loop, could be incorporated into infectious viral particles and rescued by reverse  
225 genetics. The addition of BAP tags in other positions of the VP8\* subunit may destabilize the VP4  
226 structure, interfering with its incorporation into the virion and, thus, not allowing the rescue of  
227 infectious viruses. We reasoned, therefore, that these VP4-BAP versions are strongly compromise  
228 newly generated virions because they might directly impact: *i*) the transition from upright

229 (immature) to reverse (mature) conformational VP4 states (53); *ii*) the association with specific  
230 cellular receptors (19, 20) or, *iii*) the incorporation of VP4 in the coat layer.

231           The internalization of RV virions requires a sequence of events involving interaction with  
232 the cell- membrane, followed by invagination, and then engulfment into endosomes. This process  
233 triggers a decrease of calcium levels within the endosomes, which induces loss of the virion VP4-  
234 VP7 outer layer and the release of transcriptionally active DLPs into the cytosol (54-57). The  
235 internalization kinetics of the rRV/VP4-BAP, as denoted by the ability to reach the cytosol, were  
236 found to be comparable to that of the rRV/wt. Also, VP4-BAP and VP4 share similar distribution  
237 patterns in infected cells, such as localization surrounding viroplasms, co-localization in the  
238 endoplasmic reticulum with VP7, and incorporation into newly assembled virions. However, we  
239 found that rRV/VP4-BAP has a reduced virus replication fitness compared to rRV/wt. Intriguingly,  
240 rRV/VP4-BAP viroplasms seemed to be less resistant to methanol fixation than rRV/wt, which led  
241 us to analyze viroplasms in the context of LLPS condensates by using the well-described 1,6-HD  
242 (48, 49), which compromises RV viroplasms integrity. Upon 1,6-HD removal, the re-assembly of  
243 rRV/VP4-BAP viroplasms was slower, and their number and size were reduced compared to  
244 rRV/wt. However, no differences in viroplasm liquid-like dynamics were found when the mobility  
245 of NSP2-mCherry was analyzed on single-viroplasm FRAP experiments, suggesting that the  
246 reduction observed for rRV/VP4-BAP was related to a flawed process in the viroplasm assembly  
247 but not to already formed inclusions. Our results are consistent with viroplasm behavior as LLPS  
248 condensates(50). The only difference between rRV/VP4-BAP and the rRV/wt resides in the  
249 structure of VP4, implying a role of VP4 in the structural stability of viroplasms. On this line of  
250 thinking, the rRV/VP4-BAP viroplasms behavior was further confirmed by silencing VP4 in SA11-  
251 infected cells. Consistent with a previous publication (51), the viroplasm formation was not affected  
252 by the depletion of VP4. Nevertheless, the effect on viroplasm recovery kinetic after 1,6-HD  
253 treatment was similar to the one observed on rRV/VP4-BAP viroplasms. Altogether, our data  
254 support a new functional role of VP4 directly linked to the stabilization and assembly of

255 viroplasms. In fact, VP4 has been described to interact with the actin cytoskeleton and the RV  
256 restrictive factor drebrin (25, 29, 30). Interestingly, a highly conserved actin-binding domain  
257 present in the C-terminus of VP4 has been shown to remodel actin bundles to favor RV exit (27,  
258 28). Most of these VP4-cytoskeleton associations involve the VP5\* subunit. Intriguingly, since the  
259 alteration of viroplasm stability was observed upon modification of the VP8\* subunit, we  
260 hypothesize that the VP8\* subunit is involved in at least one of these three aspects that render the  
261 viroplasms assembled and stabilized: *i*) association of VP8\* with a yet undescribed host  
262 component, *ii*) a reorganization of VP5\*-VP8\* association or *iii*) a direct role of VP8\* over another  
263 RV protein(s).

264 Identifying a target site in the spike VP4 (loop region K145-G150) permissive for the  
265 insertion of an exogenous peptide may impact the RV field. This VP4 modification favors the  
266 insertion of peptides required for super-resolution microscopy or DNA-paint technologies (e.g.,  
267 Halo or BC2 tags) to dissect debated aspects of RV entry. In addition, this VP4 modification  
268 technology could permit the incorporation of antigenic peptides for vaccine development. Although  
269 it is well-known that the current oral RV vaccines elicit an immune response (58, 59), the use of  
270 rRV harboring a modified VP4 could provide an improved vaccination platform for the display of  
271 other antigens fostering the development of a new generation of dual-vaccines.

## 272 **MATERIALS AND METHODS**

273 **Cells and viruses.** MA104 cells (embryonic African green monkey kidney cells; ATCC CRL-2378)  
274 were grown in Dulbecco's modified Eagle's medium (DMEM) (Life Technologies) containing 10%  
275 fetal calf serum (FCS) (AMIMED; BioConcept, Switzerland) and penicillin (100 U/ml)-  
276 streptomycin (100 µg/ml) (Gibco, Life Technologies). MA/cytBirA and MA/NSP2-mCherry (40)  
277 cell lines were grown in DMEM supplemented with 10% FCS, penicillin (100 U/ml)-streptomycin  
278 (100µg/ml) and 5µg/ml puromycin (InvivoGen, France). BHK-T7/9 (baby hamster kidney stably  
279 expressing T7 RNA polymerase) cells were kindly provided by Naoto Ito (Gifu University,

280 Japan)(60) and cultured in Glasgow medium supplemented with 5% FCS, 10% tryptose phosphate  
281 broth (Sigma-Aldrich), 10% FCS, penicillin(100 U/ml)-streptomycin (100µg/ml), 2% nonessential  
282 amino acids and 1% glutamine.

283 rRV/wt (40), rRV/VP4-BAP, and simian rotavirus strain SA11 (G3P6[1])(61) were  
284 propagated, grown, and purified as previously described (62). Virus titer was determined as  
285 viroplasm forming units per ml (VFU/ml) as described by (45). The T<sub>7</sub> RNA polymerase  
286 recombinant vaccinia virus (strain vvT7.3) was amplified as previously described (37).

287 **Cell line generation.** MA/cyt-BirA cell line was generated using the PiggyBac technology (63).  
288 Briefly, 10<sup>5</sup> MA104 cells were transfected with the pCMV-HyPBase (63) and transposon plasmids  
289 pPB-cytBirA using a ratio of 1:2.5 with Lipofectamine 3000 (Sigma-Aldrich) according to the  
290 manufacturer's instructions. The cells were maintained in DMEM supplemented with 10% FCS for  
291 three days and then incubated with DMEM supplemented with 10% FCS and 5 µg/ml puromycin  
292 (Sigma-Aldrich) for four days to allow the selection of cells expressing the gene of interest (40).

293 **Reverse genetics.** rRV/VP4-BAP was prepared as described previously (40, 41) using a pT<sub>7</sub>-VP4-  
294 BAP instead of pT<sub>7</sub>-VP4. Briefly, monolayers of BHK-T<sub>7</sub> cells (4 × 10<sup>5</sup>) cultured in 12-well plates  
295 were co-transfected using 2.5 µL of TransIT-LT1 transfection reagent (Mirus) per microgram of  
296 DNA plasmid. The mixture comprised 0.8 µg of SA11 rescue plasmids: pT<sub>7</sub>-VP1, pT<sub>7</sub>-VP2, pT<sub>7</sub>-  
297 VP3, pT<sub>7</sub>-VP4-BAP, pT<sub>7</sub>-VP6, pT<sub>7</sub>-VP7, pT<sub>7</sub>-NSP1, pT<sub>7</sub>-NSP3, pT<sub>7</sub>-NSP4, and 2.4 µg of pT<sub>7</sub>-  
298 NSP2 and pT<sub>7</sub>-NSP5 (38, 39). Additionally, 0.8 µg of pcDNA3-NSP2 and 0.8 µg of pcDNA3-  
299 NSP5, encoding NSP2 and NSP5 proteins, were co-transfected to increase rescue efficiency (40,  
300 41). Cells were co-cultured with MA104 cells for three days in serum-free DMEM supplemented  
301 with trypsin from porcine pancreas (0.5 µg/ml final concentration) (T0303-Sigma Aldrich) and  
302 lysed by freeze-thawing. 300 µL of the lysate was transferred to fresh MA104 cells and cultured at  
303 37°C for four days in serum-free DMEM supplemented with 0.5 µg/ml trypsin until a visible  
304 cytopathic effect. The modified genome segments of rescued recombinant rotaviruses were  
305 confirmed by specific PCR segment amplification followed by sequencing (40).

306 **Antibodies and Chemicals.** Guinea pig anti-NSP5, guinea pig anti-RV, and rabbit anti-VP4 were  
307 described previously (45, 64, 65). Rabbit anti-NSP3 was kindly provided by Susana Lopez  
308 (UNAM, Mexico), Mouse monoclonal anti-VP7 (clone 159) was kindly provided by Harry  
309 Greenberg (Stanford University, CA, USA). Mouse mAb anti-glyceraldehyde dehydrogenase  
310 (GAPDH) (clone GAPDH-71.1) and mouse anti-alpha tubulin (clone B-5-1-12) were purchase to  
311 Merck. Streptavidin-HRP was purchased from Merck. Streptavidin-Alexa 555 and secondary  
312 antibodies conjugated to Alexa 488, Alexa 594, Alexa 647, Alexa 700 (ThermoFisher Scientific).

313 **DNA plasmids.** pcDNA-VP4-SA11 was obtained by RT-PCR amplification of VP4 ORF of gs 4  
314 from rotavirus simian strain SA11 (66) using specific primers to insert *HindIII* and *XhoI* sites,  
315 followed by ligation into those sites in pcDNA3 (Invitrogen). pcDNA-VP4-*KpnI/BamHI* was built  
316 by insertion of point mutations in pcDNA-VP4-SA11 using the QuikChange site-directed  
317 mutagenesis kit and protocol (Agilent) to insert *KpnI* and *BamHI* restriction sites in VP4. pcDNA-  
318 VP4-BAP (blue), (orange), (pink), and (green) were obtained by ligation between *KpnI* and *BamHI*  
319 of pcDNA-VP4-*KpnI/BamHI* a synthetic DNA fragment (GenScript®) containing BAP tag in VP4  
320 loops in amino acid regions 96-101, 109-114, 132-137 and 145-150, respectively. The BAP tags are  
321 flanked by *BspEI* and *NheI* restriction sites for easy tag replacement. A detailed list of used DNA  
322 sequence fragments is in *SI Appendix, Table 1*.

323 RV plasmids pT<sub>7</sub>-VP1-SA11, pT<sub>7</sub>-VP2-SA11, pT<sub>7</sub>-VP3-SA11, pT<sub>7</sub>-VP4-SA11, pT<sub>7</sub>-VP6-  
324 SA11, pT<sub>7</sub>-VP7-SA11, pT<sub>7</sub>-NSP1-SA11, pT<sub>7</sub>-NSP2-SA11, pT<sub>7</sub>-NSP3-SA11, pT<sub>7</sub>-NSP4-SA11, and  
325 pT<sub>7</sub>-NSP5-SA11 were previously described (38). pcDNA3-NSP5 and pcDNA3-NSP2 were already  
326 described (40). pT<sub>7</sub>-VP4-BAP (blue), (orange), (green), and (pink) were obtained by inserting a  
327 synthetic DNA fragment (Genscript) encoding for the VP4 protein-encoding BAP tag flanked by  
328 *MfeI* and *NdeI* restriction enzymes sites and ligated into those sites in the pT<sub>7</sub>-VP4-SA11. A list of  
329 the synthesized DNA fragment is *SI Appendix, Table 1*.

330 pPB-cytBirA plasmid was obtained from a synthetic DNA fragment (Genscript) containing  
331 the BirA enzyme open reading frame of *Escherichia coli* (UniProt accession number: P06709) and  
332 inserted in the pPB-MCS vector (41) using *NheI-BamHI* restriction enzymes sites.

333 **Streptavidin-supershift assay.** The assay was performed as described by Predonzani et al.(34).  
334 Briefly, cell extracts were lysed in TNN lysis buffer (100mM Tri-HCl pH8.0, 250 mM NaCl, 0.5%  
335 NP-40, and cOmplete protease inhibitor (Roche)) and centrifuged for 7 min at 15'000 rpm and 4°C.  
336 The supernatant was exhaustively dialyzed against PBS (phosphate-buffered saline, 137 mM NaCl,  
337 2.7 mM KCl, 8 mM Na<sub>2</sub>HPO<sub>4</sub>, and 2 mM KH<sub>2</sub>PO<sub>4</sub> pH 7.2) at 4°C and heated for 5 min at 95°C in  
338 Laemml sample buffer. Samples were incubated for 1 h at 4°C with 1 µg streptavidin (Sigma) and  
339 then resolved in SDS-polyacrylamide gel under reducing conditions. Proteins were transferred to  
340 nitrocellulose 0.45 µm (67) and incubated with corresponding primary and secondary antibodies.  
341 Secondary antibodies were conjugated to IRDye680RD or IRDye800RD (LI-COR, Germany) for  
342 protein detection and quantification in Odyssey® Fc (LI-COR Biosciences).

343 **Virus fitness curve.** The experiment was performed as described previously (47) with some  
344 modifications. MA104 cells ( $2 \times 10^5$ ) seeded in 12-well plates were infected with rRV at an MOI of  
345 10 VFU/cell. The virus was allowed to adsorb for 1 h at 4°C, followed by incubation at 37°C in 500  
346 µl DMEM. At the indicated time points, the plates were frozen at -80°C. The cells were then  
347 treated with three freeze-thaw cycles, harvested, and centrifuged at 17,000 × g for 5 min at 4°C.  
348 The supernatant was recovered and activated with 80 µg/ml of trypsin for 30 min at 37°C. Two-fold  
349 serial dilutions were prepared and used to determine the viral titers described previously (40, 41).

350 **Fluorescence labeling of purified rRV.** 100 µl of purified biotinylated rRV/VP4-BAP is activated  
351 for 30 min at 37°C with 4 ul trypsin (2 mg/ml). The mixture is then incubated with 1 µl of  
352 streptavidin-Alexa Fluor 555 (2mg/ml) (ThermoFisher Scientific) for 1 h at room temperature. The  
353 tube was snapped every 20 min. Unbound streptavidin was separated labeled virus by loading the 50  
354 µl reaction mixture on top of 100 µl of a 20% sucrose-PBS cushion. Samples were centrifuged for  
355 40 min at 20 psi on Airfuge air-driven ultracentrifuge (Beckman Coulter). Pellet was resuspended in



356 20  $\mu$ l Tris-buffered saline (TBS) buffer (25 mM Tris-HCl, pH 7.4, 137 mM NaCl, 5 mM KCl, 1  
357 mM MgCl<sub>2</sub>, 0.7 mM CaCl<sub>2</sub>, 0.7 mM Na<sub>2</sub>HPO<sub>4</sub>, 5.5 mM dextrose).

358 **Immunofluorescence.** For virus internalization experiments, 1  $\mu$ l of rRV particles conjugated to  
359 SA-Alexa555 diluted in 50  $\mu$ l of DMEM was adsorbed over MA104 cells for 15 min in a metal tray  
360 cooled to -20°C. Cells were then transferred to 37°C and fixed at the indicated time-points with ice-  
361 cold methanol for 3 min on dry ice.

362 For later times post-infection, the virus was adsorbed for 1h at 4°C in a reduced volume.  
363 Then, cells were transferred to 37°C, treated at the indicated time points with 100 $\mu$ M biotin in  
364 DMEM serum-free. Cells were fixed in 2% paraformaldehyde in phosphate-buffered saline (PBS)  
365 for 10 min at room temperature. All immunofluorescences were processed as described by  
366 Buttafuoco *et al.* (67). Images were acquired using a confocal laser scanning microscope (CLSM)  
367 (DM550Q; Leica). Data were analyzed with the Leica Application Suite (Mannheim, Germany) and  
368 Image J (68).

369 **LLPS characterization.** MA/NSP2-mCherry cells were seeded at a density of  $1.2 \times 10^4$  cells per  
370 well 8-wells Lab-Tek® Chamber Slide™ (Nunc, Inc. Cat #177402). For RV infection, the virus was  
371 adsorbed at MOI of 25 VFU/cell diluted in 30  $\mu$ l of DMEM serum-free, incubated at 4°C for 1 h in  
372 an orbital shaker and then volume filled to 100 $\mu$ l with DMEM-serum-free followed by incubation at  
373 37°C. At 5 hpi, the media was replaced by media containing 3.5% 1,6-hexanediol (Sigma-Aldrich)  
374 in 2% FCS-DMEM and cells were incubated for 6 min at 37°C. Then the drug was washed out by  
375 removing the media, washing the cells three times with PBS, and adding fresh 2%FCS-DMEM and  
376 incubated at 37°C. At designated time post-recovery, cells were fixed with 2% PFA for 10 min at  
377 room temperature. Nuclei were stained by incubating cells with 1  $\mu$ g/ml of DAPI (4',6-diamidino-2-  
378 phenylindole) in PBS for 15 min at room temperature. Samples were mounted in ProLong™ Gold  
379 antifade mountant (Thermo Fischer Scientific), and Images were acquired using a fluorescence  
380 microscope (DMI6000B, Leica). Data were analyzed with ImageJ (version 2.1.0/1.53;  
381 <https://imagej.net/Fiji>).



382 **Quantification of viroplasms.** Number, size, and perinuclear localization of viroplasms were  
383 essentially acquired and analyzed as previously described (45, 69-71). The viroplasm perinuclear  
384 ratio was determined as previously described (69, 70) using the following formula: (V-N)/N,  
385 whereas V, area occupied by viroplasm and N, area of the nucleus. Data analysis was performed  
386 using Microsoft® Excel (version 16.46), and the statistical significance of differences was  
387 determined by unpaired parametric Welch's t-test comparison post-test, using Prism 9 (GraphPad  
388 Software, LLC).

389 **Rotavirus genome pattern visualization.** Rotavirus genome extraction and visualization were  
390 performed as previously described (40, 41).

391 **Negative staining of purified particles.** For staining of biotinylated TLPs with streptavidin-gold,  
392 purified particles were dialyzed overnight at 4°C in TNC buffer (10 mM Tris-HCl, pH 7.5, 140 mM  
393 NaCl, 10mM CaCl<sub>2</sub>). The TLPs were adsorbed for 10 min on carbon-coated Parlodion films  
394 mounted on 300-mesh copper grids (EMS). Samples were washed once with water, fixed in 2.5%  
395 glutaraldehyde in 100 mM Na/K-phosphate buffer, pH 7.0, for 10 min at room temperature, and  
396 washed twice with PBS before incubation with 10 µl streptavidin conjugated to 10 nm colloidal  
397 gold (Sigma-Aldrich, Inc) for 2 h at room temperature. The streptavidin-gold conjugated was  
398 treated as described previously (63) before use to separate unconjugated streptavidin from  
399 streptavidin-conjugated (72) to colloidal gold. The viral particles were further washed three times  
400 with water and stained with 2% phosphotungstate, pH 7.0 for 1 min at room temperature. Samples  
401 were analyzed in a transmission electron microscope (CM12; Philips, Eindhoven, The Netherlands)  
402 equipped with coupled device (CCD) cameras (Ultrascan 1000 and Orius SC1000A; Gatan,  
403 Pleasanton, CA, USA) at an acceleration voltage of 100 kV.

404 For calculation of the diameter of virus particles by negative staining, the area of each virus  
405 particle was calculated using Imaris software (version 2.1.0/1.53c; Creative Commons license) and  
406 then converted to the diameter as follow:  $\pi$ , where a is the area and d is the diameter of the particle,  
407 respectively.

408 **siRNA reverse transfection.** For silencing gs 4 of SA11strain, the following siRNA pool: siVP4-  
409 25 (5'-UUGCUCACGAAUUCUUAUATT-3'), siVP4-931(5'-GAAGUUACCGCACAUACUATT-  
410 3') and siVP4-1534 (5'-AUUGCAAUGUCGCAGUUAATT -3' pool was designed and synthesized  
411 by Microsynth AG (Switzerland). siRNA-A (sc-37007, Santa Cruz Biotechnology) was used as  
412 scrambled siRNA. siRNA reverse transfection was performed by mixing 1.2 µl siRNA 5 µM with 1  
413 µl lipofectamine RNAiMAX transfection reagent (Invitrogen, ThermoFisher Scientific) to a final  
414 volume of 100 µl with Opti-MEM® (Gibco, ThermoFisher Scientific) in a well of 24-well plate and  
415 incubated for 20 min at room temperature. To reach a 10nM siRNA final concentration,  $2 \times 10^4$  cells  
416 diluted in 500 µl DMEM supplemented with 10% FCS are added on top and incubated for 60 h  
417 previous to analysis. Thus, cells were infected with RV strain SA11 at MOI 12 VFU/cell as  
418 described previously (45, 47, 67).

419 **FRAP.**  $1.2 \times 10^4$  MA/NSP2 cells per well were seeded in µ-Slide 18-well glass-bottom plates  
420 (Ibidi). Cells were RV-infected at MOI of 15 VFU/cell and kept in DMEM-SF. At 4.5 hpi, the cells  
421 were counterstained with Hoechst 33342 diluted in FluoroBRITE DMEM (Gibco, Cat.No. A18967-  
422 01) at a concentration of 1µg/ml, incubated for 30 min at 37°C and subjected to FRAP analysis.  
423 FRAP experiments were performed with an SP8 Falcon confocal laser scanning microscope  
424 (CLSM) from Leica equipped with a 63x objective (NA 1.4) using the FRAP function of the LasX  
425 software (Leica) as follows: a circular area of 2 µm in diameter, encompassing an entire viroplasm,  
426 was bleached with the 405 nm and 481 nm lasers at 100% laser power for 20 iterations. The  
427 fluorescent recovery was monitored by taking fluorescence images of the mCherry channel every 2  
428 seconds for 140 min. For each FRAP acquisition, a circular area of 2 µm, encompassing an entire  
429 unbleached viroplasm in the same cell, was used as the fluorescent control, and a squared area of 5  
430 µm x 5 µm was chosen as background. The entire FRAP dataset was analyzed with MatLab  
431 (MATLAB R2020b, Mathworks) using the FRAP-tool source code from easyFRAP (Cell Cycle  
432 Lab, Medical School, University of Patras). Fully normalized data were used to generate FRAP

433 diagrams and calculate recovery half-times (T-half) and mobile fractions from independent  
434 measurements. Representative images were taken and processed for each FRAP experiment using  
435 the Imaris software v9.5 (Bitplane, Oxford Instruments). Fluorescent intensities of FRAP movies  
436 were normalized using a customized Fiji pipeline (68).

#### 437 **ACKNOWLEDGMENTS.**

438 This work has been supported by the University of Zurich. This project was also supported by a  
439 pre-doctoral ICGEB fellowship to GP and GDL. KG was supported by RAV Zollikofen  
440 and Diaconis - AMM Berner Stellennetz, Switzerland.

441 The authors declare no conflict of interest.

#### 442 **REFERENCES**

- 443 1. Troeger C, Khalil IA, Rao PC, Cao S, Blacker BF, Ahmed T, Armah G, Bines JE, Brewer  
444 TG, Colombara DV, Kang G, Kirkpatrick BD, Kirkwood CD, Mwenda JM, Parashar UD,  
445 Petri WA, Riddle MS, Steele AD, Thompson RL, Walson JL, Sanders JW, Mokdad AH,  
446 Murray CJL, Hay SI, Reiner RC. 2018. Rotavirus vaccination and the global burden of  
447 rotavirus diarrhea among children younger than 5 years. *JAMA Pediatr* 172:958-965.
- 448 2. Gomez DE, Weese JS. 2017. Viral enteritis in calves. *Can Vet J* 58:1267-1274.
- 449 3. Vlasova AN, Amimo JO, Saif LJ. 2017. Porcine rotaviruses: epidemiology, immune  
450 responses and control strategies. *Viruses* 9: 48.
- 451 4. Dhama K, Saminathan M, Karthik K, Tiwari R, Shabbir MZ, Kumar N, Malik YS, Singh  
452 RK. 2015. Avian rotavirus enteritis - an updated review. *Vet Q* 35:142-58.
- 453 5. Lawton JA, Zeng CQ, Mukherjee SK, Cohen J, Estes MK, Prasad BV. 1997. Three-  
454 dimensional structural analysis of recombinant rotavirus-like particles with intact and  
455 amino-terminal-deleted VP2: implications for the architecture of the VP2 capsid layer. *J*  
456 *Virol* 71:7353-60.
- 457 6. Zhang X, Settembre E, Xu C, Dormitzer PR, Bellamy R, Harrison SC, Grigorieff N. 2008.  
458 Near-atomic resolution using electron cryomicroscopy and single-particle reconstruction.  
459 *Proc Natl Acad Sci U S A* 105:1867-72.
- 460 7. Charpilienne A, Lepault J, Rey F, Cohen J. 2002. Identification of rotavirus VP6 residues  
461 located at the interface with VP2 that are essential for capsid assembly and transcriptase  
462 activity. *J Virol* 76:7822-31.
- 463 8. Lepault J, Petitpas I, Erk I, Navaza J, Bigot D, Dona M, Vachette P, Cohen J, Rey FA. 2001.  
464 Structural polymorphism of the major capsid protein of rotavirus. *EMBO J* 20:1498-507.
- 465 9. Li Z, Baker ML, Jiang W, Estes MK, Prasad BV. 2009. Rotavirus architecture at  
466 subnanometer resolution. *J Virol* 83:1754-66.
- 467 10. Settembre EC, Chen JZ, Dormitzer PR, Grigorieff N, Harrison SC. 2011. Atomic model of  
468 an infectious rotavirus particle. *EMBO J* 30:408-16.
- 469 11. Yoder JD, Dormitzer PR. 2006. Alternative intermolecular contacts underlie the rotavirus  
470 VP5\* two- to three-fold rearrangement. *EMBO J* 25:1559-68.

- 471 12. Yoder JD, Trask SD, Vo TP, Binka M, Feng N, Harrison SC, Greenberg HB, Dormitzer PR.  
472 2009. VP5\* rearranges when rotavirus uncoats. *J Virol* 83:11372-7.
- 473 13. Trask SD, McDonald SM, Patton JT. 2012. Structural insights into the coupling of virion  
474 assembly and rotavirus replication. *Nat Rev Microbiol* 10:165-77.
- 475 14. Arias CF, Romero P, Alvarez V, López S. 1996. Trypsin activation pathway of rotavirus  
476 infectivity. *J Virol* 70:5832-9.
- 477 15. Gilbert JM, Greenberg HB. 1998. Cleavage of rhesus rotavirus VP4 after arginine 247 is  
478 essential for rotavirus-like particle-induced fusion from without. *J Virol* 72:5323-7.
- 479 16. Dormitzer PR, Nason EB, Prasad BV, Harrison SC. 2004. Structural rearrangements in the  
480 membrane penetration protein of a non-enveloped virus. *Nature* 430:1053-8.
- 481 17. Dormitzer PR, Sun ZY, Wagner G, Harrison SC. 2002. The rhesus rotavirus VP4 sialic acid  
482 binding domain has a galectin fold with a novel carbohydrate binding site. *EMBO J* 21:885-  
483 97.
- 484 18. Fiore L, Greenberg HB, Mackow ER. 1991. The VP8 fragment of VP4 is the rhesus  
485 rotavirus hemagglutinin. *Virology* 181:553-63.
- 486 19. Graham KL, Halasz P, Tan Y, Hewish MJ, Takada Y, Mackow ER, Robinson MK, Coulson  
487 BS. 2003. Integrin-using rotaviruses bind alpha2beta1 integrin alpha2 I domain via VP4  
488 DGE sequence and recognize alphaXbeta2 and alphaVbeta3 by using VP7 during cell entry.  
489 *J Virol* 77:9969-78.
- 490 20. Graham KL, Takada Y, Coulson BS. 2006. Rotavirus spike protein VP5\* binds alpha2beta1  
491 integrin on the cell surface and competes with virus for cell binding and infectivity. *J Gen  
492 Virol* 87:1275-1283.
- 493 21. Estes MK, Graham DY, Gerba CP, Smith EM. 1979. Simian rotavirus SA11 replication in  
494 cell cultures. *J Virol* 31:810-5.
- 495 22. Enouf V, Chwetzoff S, Trugnan G, Cohen J. 2003. Interactions of rotavirus VP4 spike  
496 protein with the endosomal protein Rab5 and the prenylated Rab acceptor PRA1. *J Virol*  
497 77:7041-7.
- 498 23. Zárate S, Cuadras MA, Espinosa R, Romero P, Juárez KO, Camacho-Nuez M, Arias CF,  
499 López S. 2003. Interaction of rotaviruses with Hsc70 during cell entry is mediated by VP5. *J  
500 Virol* 77:7254-60.
- 501 24. Guerrero CA, Bouyssounade D, Zárate S, Isa P, López T, Espinosa R, Romero P, Méndez E,  
502 López S, Arias CF. 2002. Heat shock cognate protein 70 is involved in rotavirus cell entry. *J  
503 Virol* 76:4096-102.
- 504 25. Li B, Ding S, Feng N, Mooney N, Ooi YS, Ren L, Diep J, Kelly MR, Yasukawa LL, Patton  
505 JT, Yamazaki H, Shirao T, Jackson PK, Greenberg HB. 2017. Drebrin restricts rotavirus  
506 entry by inhibiting dynamin-mediated endocytosis. *Proc Natl Acad Sci U S A* 114:E3642-  
507 E3651.
- 508 26. Nejmeddine M, Trugnan G, Sapin C, Kohli E, Svensson L, Lopez S, Cohen J. 2000.  
509 Rotavirus spike protein VP4 is present at the plasma membrane and is associated with  
510 microtubules in infected cells. *J Virol* 74:3313-20.
- 511 27. Trejo-Cerro Ó, Eichwald C, Schraner EM, Silva-Ayala D, López S, Arias CF. 2018. Actin-  
512 dependent nonlytic rotavirus exit and infectious virus morphogenetic pathway in  
513 nonpolarized Cells. *J Virol* 92:e02076-17.
- 514 28. Condemine W, Eguether T, Couroussé N, Etchebest C, Gardet A, Trugnan G, Chwetzoff S.  
515 2019. The C terminus of rotavirus VP4 protein contains an actin binding domain which  
516 requires cooperation with the coiled-coil domain for actin remodeling. *J Virol* 93:e01598-  
517 18.
- 518 29. Gardet A, Breton M, Fontanges P, Trugnan G, Chwetzoff S. 2006. Rotavirus spike protein  
519 VP4 binds to and remodels actin bundles of the epithelial brush border into actin bodies. *J  
520 Virol* 80:3947-56.

- 521 30. Gardet A, Breton M, Trugnan G, Chwetzoff S. 2007. Role for actin in the polarized release  
522 of rotavirus. *J Virol* 81:4892-4.
- 523 31. Wolf M, Vo PT, Greenberg HB. 2011. Rhesus rotavirus entry into a polarized epithelium is  
524 endocytosis dependent and involves sequential VP4 conformational changes. *J Virol*  
525 85:2492-503.
- 526 32. Beckett D, Kovaleva E, Schatz PJ. 1999. A minimal peptide substrate in biotin holoenzyme  
527 synthetase-catalyzed biotinylation. *Protein Sci* 8:921-9.
- 528 33. De Lorenzo G, Eichwald C, Schraner EM, Nicolin V, Bortul R, Mano M, Burrone OR,  
529 Arnoldi F. 2012. Production of *in vivo*-biotinylated rotavirus particles. *J Gen Virol* 93:1474-  
530 82.
- 531 34. Predonzani A, Arnoldi F, López-Requena A, Burrone OR. 2008. *In vivo* site-specific  
532 biotinylation of proteins within the secretory pathway using a single vector system. *BMC*  
533 *Biotechnol* 8:41.
- 534 35. Fairhead M, Howarth M. 2015. Site-specific biotinylation of purified proteins using BirA.  
535 *Methods Mol Biol* 1266:171-84.
- 536 36. Roux KJ, Kim DI, Burke B. 2013. BioID: a screen for protein-protein interactions. *Curr*  
537 *Protoc Protein Sci* 74:19.23.1-19.23.14.
- 538 37. Fuerst TR, Niles EG, Studier FW, Moss B. 1986. Eukaryotic transient-expression system  
539 based on recombinant vaccinia virus that synthesizes bacteriophage T7 RNA polymerase.  
540 *Proc Natl Acad Sci U S A* 83:8122-6.
- 541 38. Kanai Y, Komoto S, Kawagishi T, Nouda R, Nagasawa N, Onishi M, Matsuura Y,  
542 Taniguchi K, Kobayashi T. 2017. Entirely plasmid-based reverse genetics system for  
543 rotaviruses. *Proc Natl Acad Sci U S A* 114:2349-2354.
- 544 39. Komoto S, Kanai Y, Fukuda S, Kugita M, Kawagishi T, Ito N, Sugiyama M, Matsuura Y,  
545 Kobayashi T, Taniguchi K. 2017. Reverse genetics system demonstrates that rotavirus  
546 nonstructural protein NSP6 is not essential for viral replication in cell culture. *J Virol*  
547 91:e00695-17.
- 548 40. Papa G, Venditti L, Arnoldi F, Schraner EM, Potgieter C, Borodavka A, Eichwald C,  
549 Burrone OR. 2019. Recombinant rotaviruses rescued by reverse genetics reveal the role of  
550 NSP5 hyperphosphorylation in the assembly of viral factories. *J Virol* 94:e01110-19.
- 551 41. Papa G, Venditti L, Braga L, Schneider E, Giacca M, Petris G, Burrone OR. 2020. CRISPR-  
552 Csy4-mediated editing of rotavirus double-stranded RNA genome. *Cell Rep* 32:108205.
- 553 42. Jiménez-Zaragoza M, Yubero MP, Martín-Forero E, Castón JR, Reguera D, Luque D, de  
554 Pablo PJ, Rodríguez JM. 2018. Biophysical properties of single rotavirus particles account  
555 for the functions of protein shells in a multilayered virus. *Elife* 7:e37295.
- 556 43. Dormitzer PR, Greenberg HB, Harrison SC. 2000. Purified recombinant rotavirus VP7  
557 forms soluble, calcium-dependent trimers. *Virology* 277:420-8.
- 558 44. Shaw RD, Vo PT, Offit PA, Coulson BS, Greenberg HB. 1986. Antigenic mapping of the  
559 surface proteins of rhesus rotavirus. *Virology* 155:434-51.
- 560 45. Eichwald C, Arnoldi F, Laimbacher AS, Schraner EM, Fraefel C, Wild P, Burrone OR,  
561 Ackermann M. 2012. Rotavirus viroplasm fusion and perinuclear localization are dynamic  
562 processes requiring stabilized microtubules. *PLoS One* 7:e47947.
- 563 46. Eichwald C, Rodriguez JF, Burrone OR. 2004. Characterization of rotavirus NSP2/NSP5  
564 interactions and the dynamics of viroplasm formation. *J Gen Virol* 85:625-34.
- 565 47. Eichwald C, De Lorenzo G, Schraner EM, Papa G, Bollati M, Swuec P, de Rosa M, Milani  
566 M, Mastrangelo E, Ackermann M, Burrone OR, Arnoldi F. 2018. Identification of a small  
567 molecule that compromises the structural integrity of viroplasms and rotavirus double-  
568 layered particles. *J Virol* 92:e01943-17.
- 569 48. Kroschwald S, Alberti S. 2017. Gel or die: phase separation as a survival strategy. *Cell*  
570 168:947-948.



- 571 49. Lin Y, Mori E, Kato M, Xiang S, Wu L, Kwon I, McKnight SL. 2016. Toxic PR poly-  
572 dipeptides encoded by the C9orf72 repeat expansion target LC domain polymers. *Cell*  
573 167:789-802.e12.
- 574 50. Geiger F, Papa G, Arter WE, Acker J, Saar KL, Erkamp N, Qi R, Bravo J, Strauss S,  
575 Krainer G, Burrone OR, Jungmann R, Knowles TPJ, Engelke H, Borodavka A. Rotavirus  
576 replication factories are complex ribonucleoprotein condensates. *bioRxiv*  
577 <https://doi.org/10.1101/2020.12.18.423429>
- 578 51. Déctor MA, Romero P, López S, Arias CF. 2002. Rotavirus gene silencing by small  
579 interfering RNAs. *EMBO Rep* 3:1175-80.
- 580 52. Trask SD, Dormitzer PR. 2006. Assembly of highly infectious rotavirus particles recoated  
581 with recombinant outer capsid proteins. *J Virol* 80:11293-304.
- 582 53. Herrmann T, Torres R, Salgado EN, Berciu C, Stoddard D, Nicastro D, Jenni S, Harrison  
583 SC. 2021. Functional refolding of the penetration protein on a non-enveloped virus. *Nature*  
584 590:666-670.
- 585 54. Abdelhakim AH, Salgado EN, Fu X, Pasham M, Nicastro D, Kirchhausen T, Harrison SC.  
586 2014. Structural correlates of rotavirus cell entry. *PLoS Pathog* 10:e1004355.
- 587 55. Salgado EN, Garcia Rodriguez B, Narayanaswamy N, Krishnan Y, Harrison SC. 2018.  
588 Visualization of calcium ion loss from rotavirus during cell entry. *J Virol* 92:e01327-18.
- 589 56. Salgado EN, Upadhyayula S, Harrison SC. 2017. Single-particle detection of transcription  
590 following rotavirus entry. *J Virol* 91: e00651-17.
- 591 57. Trask SD, Kim IS, Harrison SC, Dormitzer PR. 2010. A rotavirus spike protein  
592 conformational intermediate binds lipid bilayers. *J Virol* 84:1764-70.
- 593 58. Vesikari T, Clark HF, Offit PA, Dallas MJ, DiStefano DJ, Goveia MG, Ward RL, Schödel  
594 F, Karvonen A, Drummond JE, DiNubile MJ, Heaton PM. 2006. Effects of the potency and  
595 composition of the multivalent human-bovine (WC3) reassortant rotavirus vaccine on  
596 efficacy, safety and immunogenicity in healthy infants. *Vaccine* 24:4821-9.
- 597 59. Ruiz-Palacios GM, Pérez-Schael I, Velázquez FR, Abate H, Breuer T, Clemens SC,  
598 Chevart B, Espinoza F, Gillard P, Innis BL, Cervantes Y, Linhares AC, López P, Macías-  
599 Parra M, Ortega-Barría E, Richardson V, Rivera-Medina DM, Rivera L, Salinas B, Pavía-  
600 Ruz N, Salmerón J, Rüttimann R, Tinoco JC, Rubio P, Nuñez E, Guerrero ML, Yarzabal JP,  
601 Damaso S, Tornieporth N, Sáez-Llorens X, Vergara RF, Vesikari T, Bouckennooghe A,  
602 Clemens R, De Vos B, O'Ryan M, Group HRVS. 2006. Safety and efficacy of an attenuated  
603 vaccine against severe rotavirus gastroenteritis. *N Engl J Med* 354:11-22.
- 604 60. Ito N, Takayama-Ito M, Yamada K, Hosokawa J, Sugiyama M, Minamoto N. 2003.  
605 Improved recovery of rabies virus from cloned cDNA using a vaccinia virus-free reverse  
606 genetics system. *Microbiol Immunol* 47:613-7.
- 607 61. Guglielmi KM, McDonald SM, Patton JT. 2010. Mechanism of intraparticle synthesis of the  
608 rotavirus double-stranded RNA genome. *J Biol Chem* 285:18123-8.
- 609 62. Arnold M, Patton JT, McDonald SM. 2009. Culturing, storage, and quantification of  
610 rotaviruses. *Curr Protoc Microbiol Chapter 15:Unit 15C.3*.
- 611 63. Yusa K, Zhou L, Li MA, Bradley A, Craig NL. 2011. A hyperactive piggyBac transposase  
612 for mammalian applications. *Proc Natl Acad Sci U S A* 108:1531-6.
- 613 64. Eichwald C, Vascotto F, Fabbretti E, Burrone OR. 2002. Rotavirus NSP5: mapping  
614 phosphorylation sites and kinase activation and viroplasm localization domains. *J Virol*  
615 76:3461-70.
- 616 65. Sun M, Giambiagi S, Burrone O. 1997. [VP4 protein of simian rotavirus strain SA11  
617 expressed by a baculovirus recombinant]. *Zhongguo Yi Xue Ke Xue Yuan Xue Bao* 19:48-  
618 53.
- 619 66. Arnoldi F, Campagna M, Eichwald C, Desselberger U, Burrone OR. 2007. Interaction of  
620 rotavirus polymerase VP1 with nonstructural protein NSP5 is stronger than that with NSP2.  
621 *J Virol* 81:2128-37.

- 622 67. Buttafuoco A, Michaelsen K, Tobler K, Ackermann M, Fraefel C, Eichwald C. 2020.  
623 Conserved Rotavirus NSP5 and VP2 Domains Interact and Affect Viroplasm. *J Virol* 94.  
624 68. Schindelin J, Arganda-Carreras I, Frise E, Kaynig V, Longair M, Pietzsch T, Preibisch S,  
625 Rueden C, Saalfeld S, Schmid B, Tinevez JY, White DJ, Hartenstein V, Eliceiri K,  
626 Tomancak P, Cardona A. 2012. Fiji: an open-source platform for biological-image analysis.  
627 *Nat Methods* 9:676-82.  
628 69. Eichwald C, Ackermann M, Nibert ML. 2018. The dynamics of both filamentous and  
629 globular mammalian reovirus viral factories rely on the microtubule network. *Virology*  
630 518:77-86.  
631 70. Eichwald C, Ackermann M, Fraefel C. 2020. Mammalian orthoreovirus core protein  $\mu$ 2  
632 reorganizes host microtubule-organizing center components. *Virology* 549:13-24.  
633 71. Glück S, Buttafuoco A, Meier AF, Arnoldi F, Vogt B, Schraner EM, Ackermann M,  
634 Eichwald C. 2017. Rotavirus replication is correlated with S/G2 interphase arrest of the host  
635 cell cycle. *PLoS One* 12:e0179607.  
636 72. Bauer M, Smith GP. 1988. Filamentous phage morphogenetic signal sequence and  
637 orientation of DNA in the virion and gene-V protein complex. *Virology* 167:166-75.  
638

## 639 **FIGURE LEGENDS**

640 **Figure 1. Generation of VP4-BAP tagged recombinant rotavirus** (A) Schematic representation  
641 of BAP tag inserted in lectin domain loops of the VP8\* subunit of VP4 from RV simian strain  
642 SA11(GenBank: X14204.1). The lysine (K, red) indicates the biotinylation site by BirA ligase. Four  
643 different VP4 proteins tagged with BAP (VP4-BAP) were built between amino acid regions T96-  
644 R101 (blue), E109-S114(orange), N132-Q137 (pink), and K145-G150 (green). VP4 trimer ribbon  
645 structure for visualization of VP5CT (body and stalk, red) and VP8\* (yellow) fragments. An inset  
646 in VP8\* indicates the different positions in hydrophobic loops of VP8\* where the inserted BAP tags  
647 were colored in blue, orange, pink, and green. (B) Western blot retardation assay of cell lysates  
648 transiently expressing wtVP4 and VP4-BAP tagged at blue, orange, pink, and green positions,  
649 respectively. Untreated (-) and treated (+) samples with streptavidin are indicated. Immunoblot was  
650 incubated with anti-VP4 to detect unbound and bound VP4 to streptavidin (VP4-BAP•StAv).  
651 Alpha-tubulin was used as a loading control. (C) Comparison of the dsRNA genome segments  
652 migration pattern of rRV/wt and rRV/VP4-BAP. The red arrow points to gs -BAP. (D) Virus  
653 replication fitness curve between 0 to 48 hpi of rRV/wt and rRV/VP4-BAP. (E) Immunoblotting of  
654 uninfected (-) or infected cell lysates in MA-cytBirA (left panel) or MA104 (right panel) with

655 rRV/wt or rRV/VP4-BAP [MOI, 25 VFU/cell]. Biotinylated proteins were detected with StAv-  
656 HRP. Alpha-tubulin was used as a loading control. The red star and red arrow indicate biotinylated  
657 VP4-BAP and host undetermined biotinylated protein, respectively. **(F)** WB-ra of MA-cytBirA cell  
658 lysates infected with rRV/wt or rRV/VP4-BAP untreated or treated with StAv. The membrane was  
659 incubated with anti-VP4 and anti-VP6 for the detection of virus proteins. Alpha-tubulin was used as  
660 a loading control. The percentage of biotinylated VP4 normalized according to VP6 expression is  
661 indicated. **(G)** WB-ra of purified rRV/VP4-BAP particles incubated without (-) and with (+)  
662 streptavidin. The membrane was incubated for the detection of VP4-BAP (anti-VP4) and VP6 (anti-  
663 VP6). Alpha-tubulin was used as a loading control. The percentage of biotinylated VP4-BAP was  
664 determined and normalized to the expression of VP6. **(H)** Visualization at a high resolution of  
665 purified virions isolated of rRV/VP4-BAP infected MA-cytBirA cells untreated (-biotin, upper  
666 panel) or treated (+biotin, lower panel) with 100 $\mu$ M biotin. After purification, the virions were  
667 labeled with streptavidin conjugated to colloidal gold (12 nm), followed by negative staining and  
668 visualization at the electron microscope (right panel). Scale bar is 100 nm

669 **Figure 2. virus entry and RV protein localization upon rRV/VP4-BAP infection.** **(A)**  
670 Internalization in MA104 cells of purified virions at 0 min (upper panel) and 2 min (lower panel).  
671 Purified virions of rRV/wt and biotinylated rRV/VP4-BAP were previously labeled with StAv-  
672 Alexa 555 (red). At the indicated time points, cells were fixed and immunostained for VP7 trimers  
673 detection (mAb anti-VP7 clone 159, pink) and MTs (anti-  $\alpha$ -tubulin, green). Nuclei were stained  
674 with DAPI (blue). White open boxes indicate the magnified images at the right. Arrows point to  
675 virus particle clamps detected with VP7. Scale bar is 20  $\mu$ m. **(B)** MA-cytBirA cells infected with  
676 rRV/wt (top panel) and rRV/VP4-BAP (bottom panel) untreated (-biotin) and treated (+biotin) with  
677 biotin. Cells were PFA fixed at 6 hpi and stained for viroplasms (anti-NSP5, green) and biotinylated  
678 proteins (streptavidin-Alexa 555, red) detection. Nuclei were stained with DAPI (blue). **(C)**  
679 Immunostaining images of rRV/VP4-BAP infected MA-cytBirA cells in the presence of biotin. At  
680 6 hpi, PFA fixed cells were stained for the detection of VP4-BAP (StAv, red) with viroplasms (anti-



681 NSP5, green) (left row) or mature RV particles (anti-VP7 clone 159, green) (right row). **(D)**  
682 immunofluorescence images comparing localization of VP4 and VP4-BAP (anti-VP4, red) of cells  
683 infected with rRV/wt (left row) or rRV/VP4-BAP (right row). Viroplasms were detected with anti-  
684 NSP5 (green). The dashed white boxes correspond to the image insets of the right columns. Purple  
685 arrows point to the VP4-BAP streptavidin signal. Scale bar is 10  $\mu$ m.

686 **Figure 3. rRV/VP4-BAP viroplasms revealed a delayed dynamic associated with VP4 role. (A)**

687 Schematic representation for the characterization of LLPS condensates on viroplasms of rRV/VP4-  
688 BAP-infected cells. At 5 hpi, RV infected MA/NSP2-mCherry cells were treated with 1,6-HD for 6  
689 min. The drug was washed out, and samples were fixed and imaged for viroplasm quantification at  
690 0-, 2-, 15- and 30-min post-recovery. **(B)** 1,6-HD recovery plot of cells showing viroplasms  
691 normalized to initial conditions (5 hpi). **(C)** 1,6-HD recovery plot of viroplasm counts per cell upon  
692 infection with rRV/VP4-BAP (green column) and rRV/wt (grey column). Plots of viroplasm counts  
693 per cell **(D)** and viroplasm size per cell **(E)** at initial conditions (5 hpi). **(F)** 1,6-HD recovery plot of  
694 normalized viroplasm size at initial conditions. **(G)** FRAP recovery curve of NSP2-mCherry of  
695 single viroplasms of rRV/VP4-BAP (green) and rRV/wt (grey) infected MA/NSP2-mCherry cells, 5  
696 hpi (n=27 and 25, respectively). 1,6-HD recovery plots showing appearing viroplasms **(H)**, number  
697 of viroplasms per cell **(I)**, and viroplasm size per cell **(J)** of SA11 infected MA104 cells silenced  
698 with siVP4 (orange) or control siRNA (scr, blue). Data represent mean  $\pm$  SEM Student's t-test (\*),  
699  $p < 0.05$ ; (\*\*),  $p < 0.01$  and (\*\*\*),  $p < 0.001$

700

## 701 SUPPLEMENTAL MATERIAL

### 702 SUPPLEMENTARY FIGURE LEGENDS

703 **Figure S1. (A)** Immunoblotting of cellular extracts of transfected VP4-BAP (lane 1) and infected  
704 rRV/VP4-BAP (lane 2). **(B)** Immunoblot of cellular extracts of transfected VP4-BAP untreated (-)  
705 or treated (+) with lambda phosphatase. VP4-BAP shifted band is indicated with a red start.

706 Membranes were incubated with anti-VP4 and anti-tubulin. **(C)** Sequence chromatogram of gs4-  
707 BAP of rRV/VP4-BAP visualizing inserted linkers and BAP tag. Nucleotide (top) and amino acid  
708 (bottom) sequences are indicated. **(D)** Negative staining of virion layers detected in purified  
709 rRV/VP4-BAP preparations. The yellow arrow points to TLPs. Scale bar is 100 nm. **(E)** Scatter dot  
710 plot comparing the diameter of purified particles from non-biotinylated (-biotin, light green) or  
711 biotinylated (+biotin, dark green) RV/VP4-BAP and rRV/wt (grey). The median value is indicated,  
712  $n > 40$  particles, t-test student, (\*)  $p$ -value  $< 0.05$ .

713 **Figure S2. (A)** Immunofluorescence images of viroplasms (anti-NSP5, green) from cells infected  
714 with rRV/wt (left panel) or rRV/VP4-BAP (right panel). At 6 hpi, cells were fixed with either PFA  
715 (upper row) or methanol (lower row), followed by immunostaining. Nuclei were stained with DAPI  
716 (blue). White arrowheads point to green aggregates. Scale bar is 20  $\mu$ m. **(B)** Representative images  
717 of MA-NSP2-mCherry cells infected at 5 hpi with rRV/wt (upper row) or rRV/VP4-BAP (lower  
718 row) and treated for 6 min with 3.5% of 1,6-HD. Cells were washed and monitored for viroplasm  
719 formation at 0-, 2-, 15- and 30-min post-recovery. White arrows point to cells showing recovered  
720 viroplasms. Scale bar is 10  $\mu$ m. **(C)** Plot for the perinuclear ratio of cells infected with rRV/VP4-  
721 BAP and rRV/wt at initial conditions (5 hpi). **(D)** 1,6-HD recovery plot of the normalized  
722 perinuclear ratio of viroplasms from cells infected with rRV/VP4-BAP (green) and rRV/wt (grey).  
723 **(E)** Fluorescence images of FRAP measurement of single viroplasms of cells infected with  
724 rRV/VP4 (top) and rRV/wt (bottom) at pre-bleach, post-bleach, and recovery time conditions. Each  
725 inset indicates the bleached viroplasm of the images at the right. Nuclei were stained with Hoescht  
726 33342. Scale bar is 10  $\mu$ m. Plots of the T-half recovery **(F)** and the mobile fraction **(G)** means of  
727 single viroplasms of rRV/VP4-BAP and rRV/wt.

728 **Figure S3. (A)** Immunoblot of 6 hpi cellular lysates prepared from MA104 or MA-NSP2-mCherry  
729 cells silenced with siVP4 or control siRNA (scr) followed by mock-infection or infection with RV  
730 simian strain SA11. The membrane was stained with anti-VP4, anti-NSP5, and anti-GAPDH  
731 (loading control). **(B)** Immunostaining at 6 hpi of SA11-infected MA-NSP2-mCherry cells knocked

732 down with control siRNA (scr) (upper row) or siVP4 (lower row). Cells were immunostained with  
733 anti-VP4 (green). Nuclei were stained with DAPI (blue). Scale bar is 10  $\mu$ m. **(C)**  
734 Immunofluorescence analysis at 6 hpi of SA11-infected MA104 cells silenced with siVP4 or  
735 control siRNA. Cells were fixed either PFA (upper row) or methanol (lower row), followed by  
736 viroplasm immunostaining (anti-NSP5, green). Nuclei were stained with DAPI (blue). White  
737 arrowheads point to diffuse viroplasms. Scale bar is 20  $\mu$ m. **(D)** Representative images of SA11-  
738 infected MA-NSP2-mCherry cells knocked down with scr (upper row) or siVP4 (lower row) and  
739 treated for 6 min with 3.5% of 1,6-HD. Cells were washed and monitored for viroplasm formation  
740 at 0-, 2-, 15- and 30-min post-recovery. White arrows point to cells showing recovered viroplasms.  
741 Scale bar is 10  $\mu$ m.



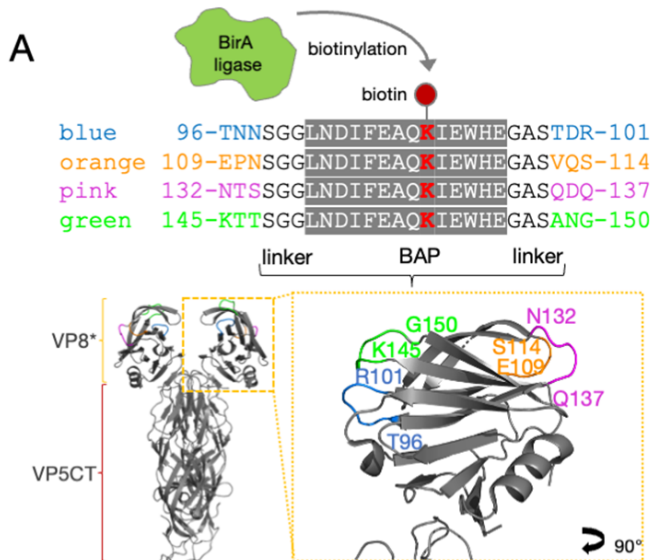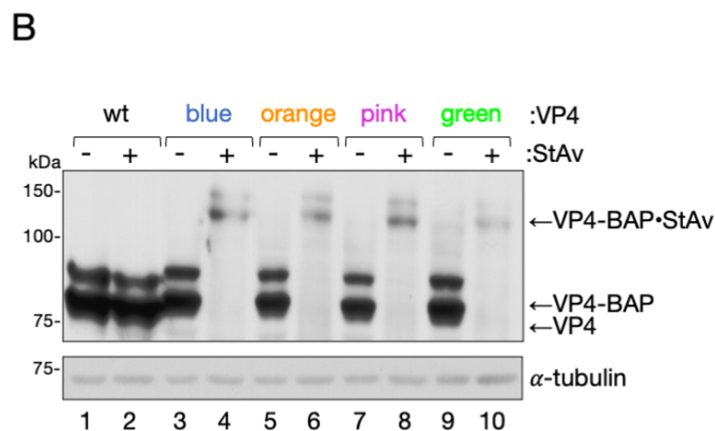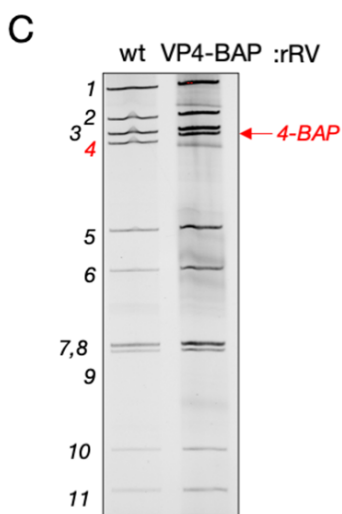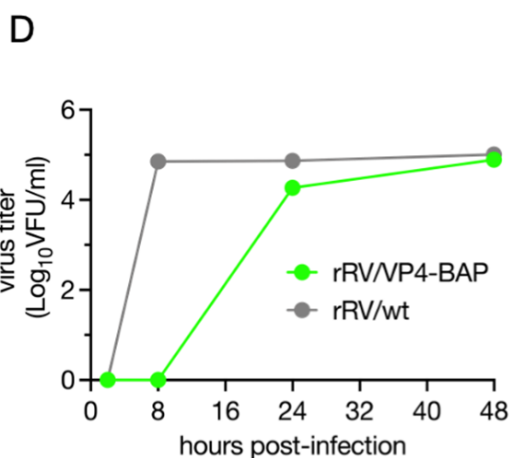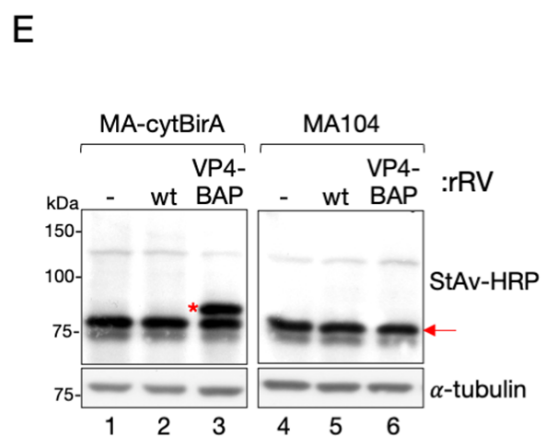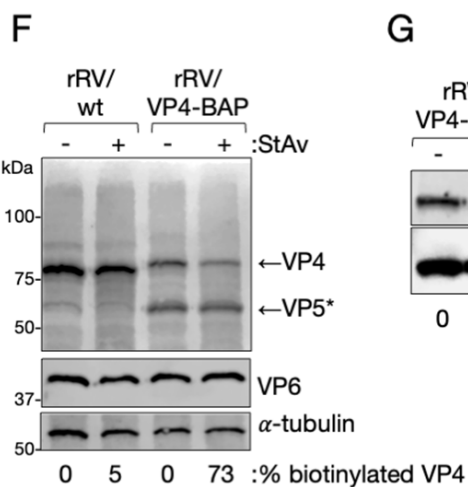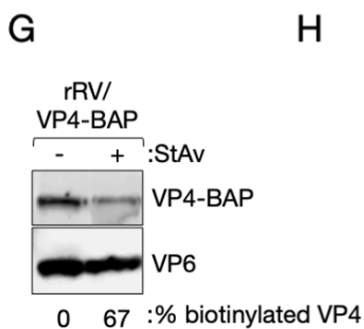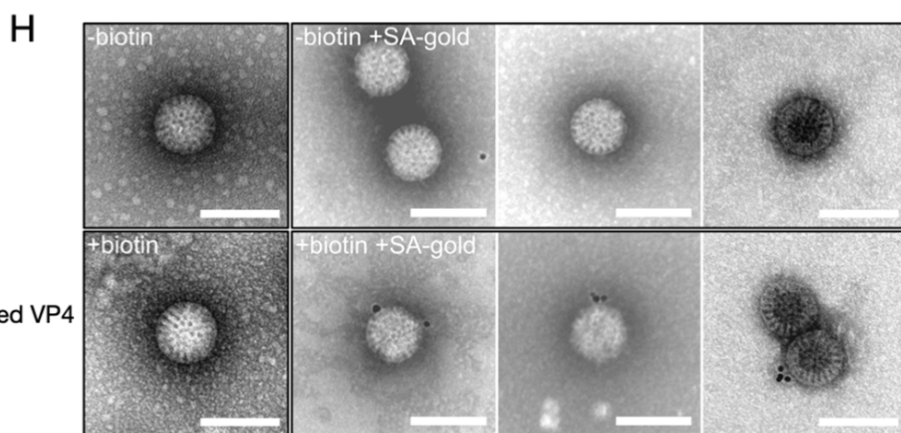



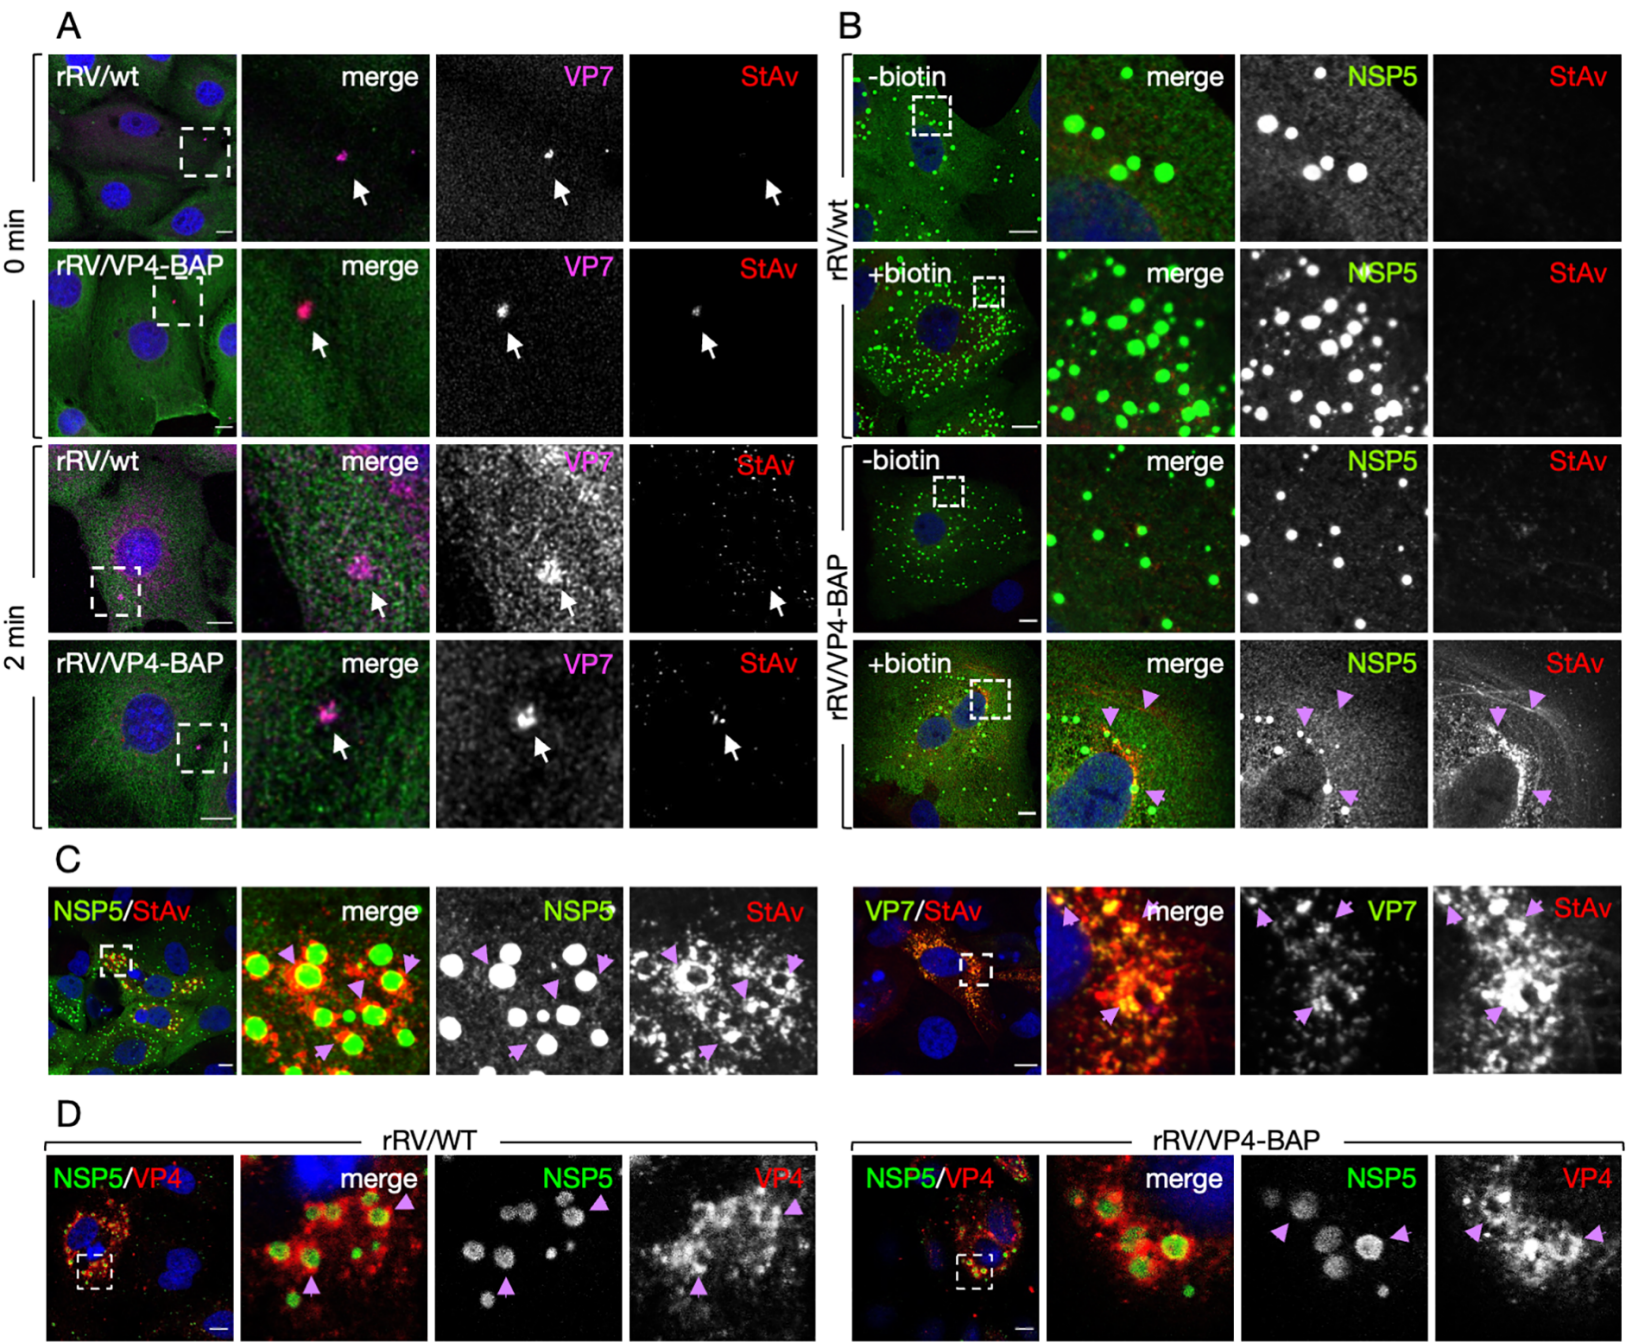

**A**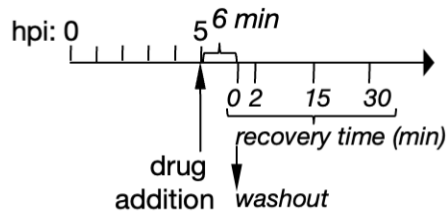**B**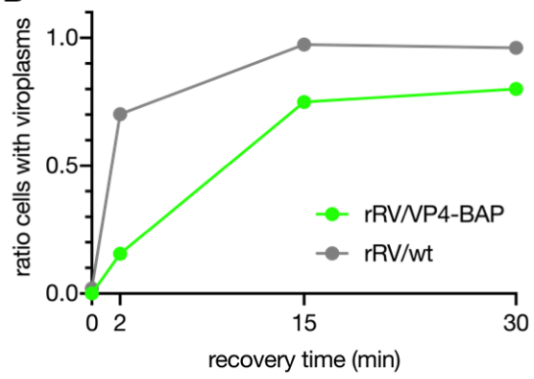**C**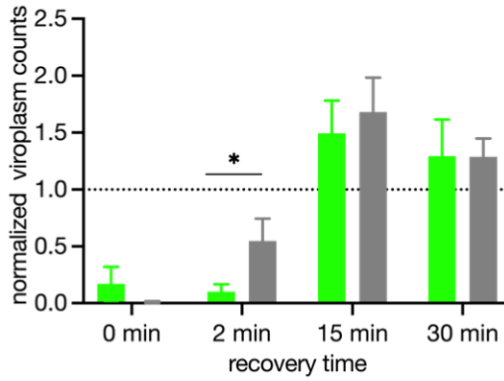**D**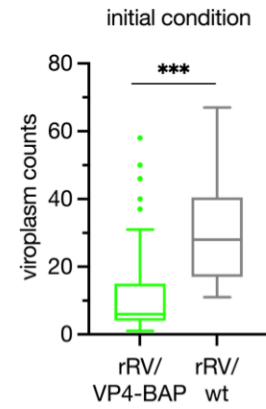**E**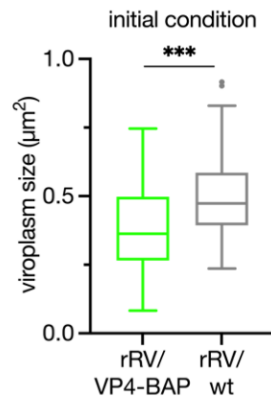**F**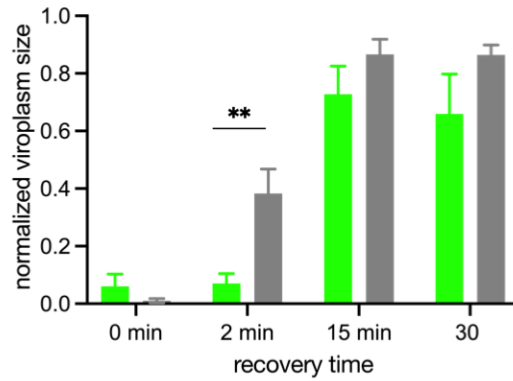**G**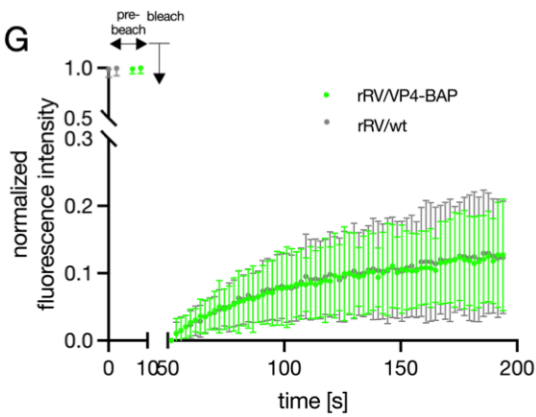**H**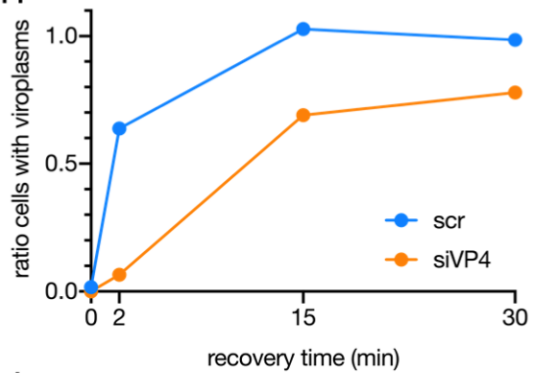**I**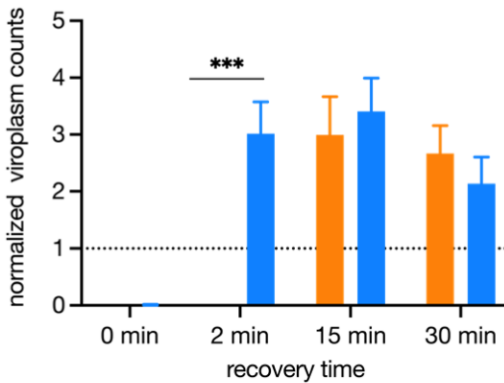**J**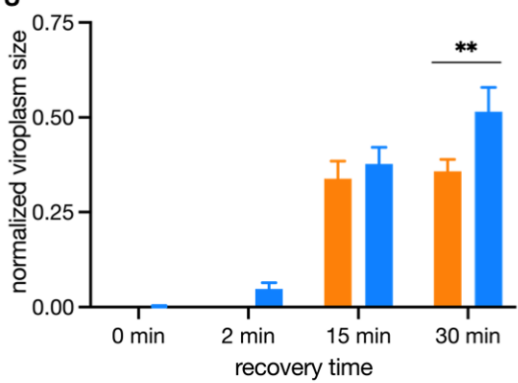

Source: http://biorxiv.org/content/10.1101/2021.05.13.444118v1.full.pdf
